# Supplementary material
Source: PubMed Central journal article supplement (PMC4790642)
Supplement: plaj002354.wf1_default.pdf [file plaj002354.wf1_default.pdf]

# Web figure: Funnel plot of post-tonsillectomy bleeding

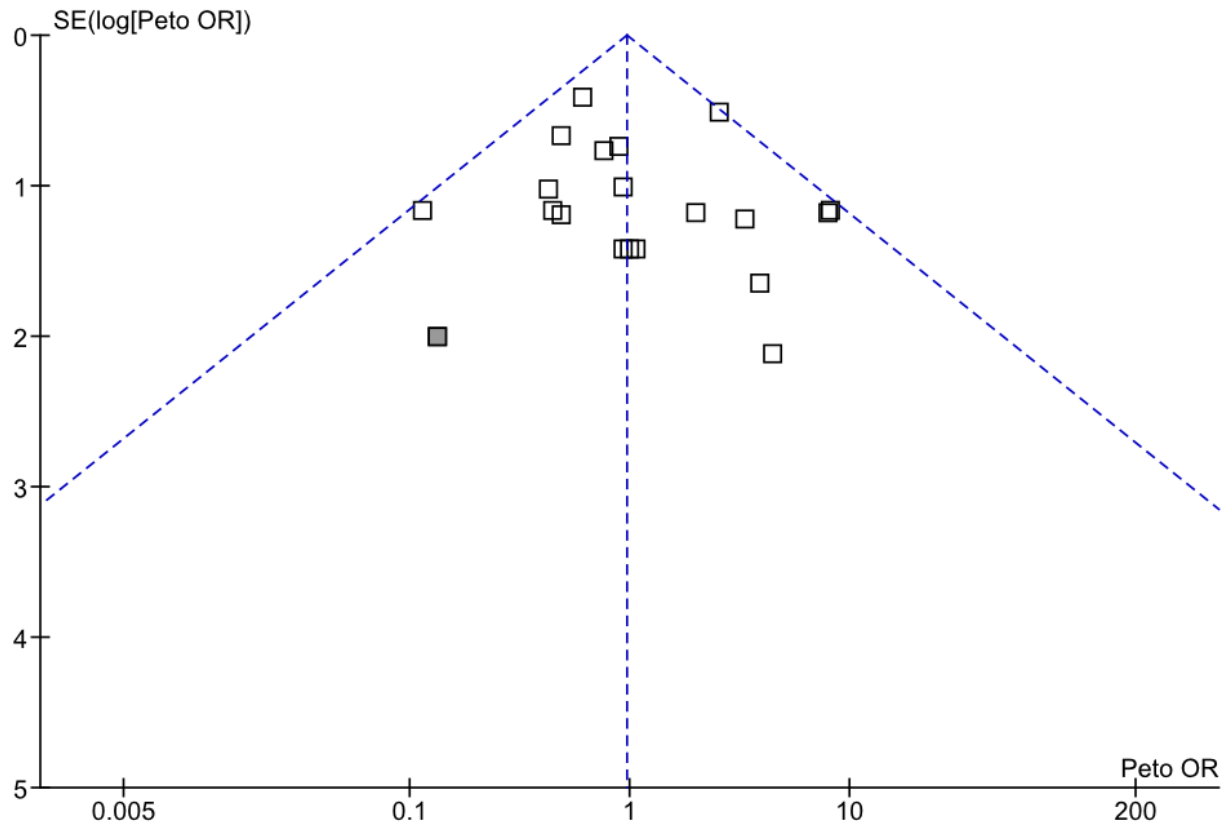

Legend: gray background was used when two studies were impossible to distinguish.
